# Supplementary material
Source: PubMed Central journal article supplement (PMC4111140)

**Supplementary Table 1** Sampling localities for accessions from the *M. guttatus* complex included in our genetic, phenotypic, and redundancy analyses. Accessions are ordered first by state/province from north to south, then alphabetically. AL = Alaska; BC = British Columbia; WA = Washington; OR = Oregon; CA = California; ID = Idaho; NV = Nevada; CO = Colorado; AZ = Arizona

| Species               | Accession ID | State or Province | Latitude (N) | Longitude (W) | Elevation (m) | Annual/Perennial |
|-----------------------|--------------|-------------------|--------------|---------------|---------------|------------------|
| <i>M. arvensis</i>    | CVP          | CA                | 38.372       | -123.055      | 224           | A                |
|                       | NAP          | CA                | 38.752       | -122.615      | 335           | A                |
|                       | POT          | CA                | 37.925       | -122.609      | 622           | A                |
| <i>M. cupriphilus</i> | SEC          | CA                | 37.915       | -120.725      | 297           | A                |
| <i>M. guttatus</i>    | NKL          | BC                | 50.358       | -126.930      | 96            | A                |
|                       | SKZ          | BC                | 48.782       | -123.953      | 125           | A                |
|                       | TAY          | BC                | 49.299       | -125.292      | 59            | A                |
|                       | WLD          | BC                | 49.898       | -124.550      | 286           | A                |
|                       | AWP          | WA                | 48.495       | -122.702      | 22            | A                |
|                       | LCU          | WA                | 47.495       | -123.277      | 230           | A                |
|                       | RFA          | WA                | 46.631       | -123.230      | 83            | A                |
|                       | BSP          | OR                | 43.712       | -124.099      | 13            | A                |
|                       | BVG          | OR                | 43.059       | -123.571      | 476           | A                |
|                       | FEV          | OR                | 44.400       | -122.298      | 490           | A                |
|                       | IM           | OR                | 44.401       | -122.150      | 1582          | A                |
|                       | LIN          | OR                | 45.136       | -123.896      | 18            | A                |
|                       | MAR          | OR                | 43.479       | -123.294      | 183           | A                |
|                       | MED          | OR                | 37.809       | -120.302      | 288           | A                |
|                       | RGR          | OR                | 42.489       | -124.208      | 17            | A                |
|                       | S2G          | OR                | 43.982       | -123.096      | 580           | A                |
|                       | SAG          | OR                | 44.797       | -122.544      | 243           | A                |
|                       | SAM          | OR                | 45.959       | -123.680      | 545           | A                |
|                       | SWC          | OR                | 43.959       | -123.902      | 38            | A                |
|                       | BHI          | CA                | 41.155       | -123.890      | 777           | A                |
| BHT                   | CA           | 37.977            | -120.639     | 293           | A             |                  |
| CAV                   | CA           | 38.343            | -122.485     | 118           | A             |                  |

| Species            | Accession ID | State or Province | Latitude (N) | Longitude (W) | Elevation (m) | Annual/Perennial |
|--------------------|--------------|-------------------|--------------|---------------|---------------|------------------|
| <i>M. guttatus</i> | GCC          | CA                | 37.874       | -120.434      | 392           | A                |
|                    | GTR          | CA                | 38.580       | -122.197      | 144           | A                |
|                    | KLM          | CA                | 41.270       | -123.606      | 227           | A                |
|                    | LON          | CA                | 38.044       | -120.648      | 512           | A                |
|                    | LQH          | CA                | 37.921       | -120.717      | 279           | A                |
|                    | OAE          | CA                | 38.411       | -122.960      | 280           | A                |
|                    | PCR          | CA                | 40.641       | -123.892      | 702           | A                |
|                    | RNC          | CA                | 38.911       | -123.245      | 314           | A                |
|                    | SEX          | CA                | 37.915       | -120.725      | 297           | A                |
|                    | SGS          | CA                | 34.301       | -118.107      | 1164          | A                |
|                    | SHO          | CA                | 37.931       | -120.733      | 204           | A                |
|                    | SSR          | CA                | 38.676       | -123.240      | 333           | A                |
|                    | STO          | CA                | 38.439       | -122.940      | 212           | A                |
|                    | USK          | CA                | 38.672       | -123.210      | 125           | A                |
|                    | CMF          | CA                | 38.443       | -122.974      | 87            | A                |
|                    | KRR          | CA                | 38.580       | -123.117      | 106           | A                |
|                    | AGG          | BC                | 52.626       | -131.422      | 15            | P                |
|                    | ATT          | AL                | 52.936       | -123.245      | 1200          | P                |
|                    | BAM          | BC                | 48.837       | -125.144      | 3             | P                |
|                    | CPB          | BC                | 53.171       | -131.785      | 10            | P                |
|                    | GPT          | BC                | 49.052       | -125.722      | 0             | P                |
|                    | PCL          | BC                | 53.689       | -132.184      | 5             | P                |
|                    | SCC          | BC                | 48.412       | -124.012      | 1             | P                |
|                    | TSG          | BC                | 53.419       | -131.916      | 17            | P                |
|                    | CHR          | WA                | 46.780       | -121.779      | 1118          | P                |
|                    | GBS          | OR                | 42.425       | -124.410      | 26            | P                |
|                    | HEC          | OR                | 44.135       | -124.123      | 11            | P                |
|                    | MWV          | OR                | 44.419       | -121.773      | 1215          | P                |
|                    | OSW          | OR                | 45.761       | -123.983      | 0             | P                |

| Species | Accession ID | State or Province | Latitude (N) | Longitude (W) | Elevation (m) | Annual/Perennial |
|---------|--------------|-------------------|--------------|---------------|---------------|------------------|
|         | OTT          | OR                | 44.753       | -124.057      | 76            | P                |
|         | THR          | OR                | 44.101       | -121.623      | 1992          | P                |
|         | ANR          | CA                | 39.737       | -123.631      | 397           | P                |
|         | BCB          | CA                | 36.063       | -121.592      | 8             | P                |
|         | BSR          | CA                | 40.529       | -124.163      | 16            | P                |
|         | BUL          | CA                | 34.921       | -120.436      | 73            | P                |
|         | CAB          | CA                | 39.359       | -123.817      | 5             | P                |
|         | CAN          | CA                | 36.069       | -121.551      | 573           | P                |
|         | DAV          | CA                | 37.025       | -122.218      | 4             | P                |
|         | GBM          | CA                | 41.379       | -124.069      | 21            | P                |
|         | MRR          | CA                | 38.456       | -123.141      | 8             | P                |
|         | ORO          | CA                | 35.273       | -120.889      | 10            | P                |
|         | SBC          | CA                | 36.484       | -121.196      | 647           | P                |
|         | SMO          | CA                | 38.323       | -122.590      | 494           | P                |
|         | STB          | CA                | 37.891       | -122.635      | 9             | P                |
|         | SVH          | CA                | 41.616       | -120.104      | 1408          | P                |
|         | SWB          | CA                | 39.036       | -123.690      | 4             | P                |
|         | USB          | CA                | 39.832       | -123.849      | 11            | P                |
|         | WEV          | CA                | 35.423       | -120.789      | 108           | P                |
|         | WFM          | ID                | 44.710       | -114.335      | 1992          | P                |
|         | YJS          | ID                | 44.951       | -114.584      | 1656          | P                |
|         | ALL          | NV                | 39.006       | -114.219      | 2076          | P                |
|         | BOB          | NV                | 48.529       | -124.451      | 4             | P                |
|         | BOG          | NV                | 41.924       | -118.804      | 1308          | P                |
|         | DHS          | NV                | 41.051       | -119.029      | 1208          | P                |
|         | SOL          | NV                | 40.051       | -116.985      | 1597          | P                |
|         | CC           | CO                | 38.986       | -106.948      | 3214          | P                |
|         | COT          | CO                | 38.839       | -106.419      | 3517          | P                |
|         | EML          | CO                | 39.007       | -107.040      | 3193          | P                |

| Species              | Accession ID         | State or Province | Latitude (N) | Longitude (W) | Elevation (m) | Annual/Perennial |   |
|----------------------|----------------------|-------------------|--------------|---------------|---------------|------------------|---|
| <i>M. laciniatus</i> | PGA                  | CO                | 38.964       | -107.094      | 3259          | P                |   |
|                      | SCH                  | CO                | 39.018       | -107.035      | 3448          | P                |   |
|                      | STR                  | CO                | 39.025       | -107.031      | 3377          | P                |   |
|                      | PED                  | AZ                | 32.711       | -110.628      | 727           | P                |   |
|                      | GB                   | OR                | 37.136       | -122.133      | 1865          | A                |   |
|                      | TRT                  | OR                | 37.716       | -119.705      | 1479          | A                |   |
|                      | CECL                 | CA                | 37.309       | -119.495      | 1302          | A                |   |
|                      | DNK                  | CA                | 37.085       | -119.218      | 1880          | A                |   |
|                      | PETL                 | CA                | 37.056       | -119.369      | 1250          | A                |   |
|                      | SHL                  | CA                | 37.145       | -119.306      | 1603          | A                |   |
|                      | SNB                  | CA                | 37.042       | -119.404      | 1043          | A                |   |
|                      | TIGR                 | CA                | 37.812       | -119.506      | 2584          | A                |   |
|                      | WLF                  | CA                | 37.842       | -119.594      | 2405          | A                |   |
|                      | <i>M. micranthus</i> | LGR               | CA           | 39.140        | -123.286      | 622              | A |
| <i>M. nasutus</i>    | WSK                  | WA                | 45.754       | -121.518      | 148           | A                |   |
|                      | HCN                  | OR                | 42.547       | -123.502      | 360           | A                |   |
|                      | NFN                  | OR                | 45.241       | -122.261      | 218           | A                |   |
|                      | SBN                  | OR                | 45.261       | -121.033      | 241           | A                |   |
|                      | SF                   | OR                | 45.262       | -121.030      | 242           | A                |   |
|                      | BCR                  | CA                | 37.823       | -120.258      | 867           | A                |   |
|                      | MEN                  | CA                | 37.809       | -120.302      | 288           | A                |   |
|                      | MHA                  | CA                | 37.340       | -121.657      | 962           | A                |   |
|                      | SHI                  | CA                | 39.877       | -123.732      | 225           | A                |   |
|                      | SMC                  | CA                | 36.062       | -121.554      | 696           | A                |   |
|                      | SQP                  | CA                | 36.565       | -118.766      | 1965          | A                |   |
|                      | <i>M. nudatus</i>    | GUN               | CA           | 38.752        | -122.615      | 335              | A |
|                      | <i>M. pardalis</i>   | DPP               | CA           | 37.661        | -120.456      | 94               | A |
|                      | <i>M. tilingii</i>   | BAG               | WA           | 48.873        | -121.688      | 1186             | P |
| RAN                  |                      | WA                | 47.010       | -121.760      | 1354          | P                |   |

---

| Species | Accession ID | State or Province | Latitude (N) | Longitude (W) | Elevation (m) | Annual/Perennial |
|---------|--------------|-------------------|--------------|---------------|---------------|------------------|
|         | STV          | WA                | 46.802       | -121.714      | 1910          | P                |
|         | TWN          | WA                | 48.950       | -121.636      | 1594          | P                |
|         | ICE          | OR                | 45.226       | -117.268      | 2402          | P                |
|         | LPI          | CA                | 38.289       | -119.638      | 3167          | P                |
|         | LVR          | CA                | 37.951       | -119.226      | 2774          | P                |
|         | SAB          | CA                | 37.212       | -118.610      | 2793          | P                |
|         | SOP          | CA                | 40.362       | -120.510      | 1251          | P                |

---

**Supplementary Table 2** Primers for the 1 microsatellite and 15 intron-length polymorphic markers used in our genetic analyses. All primers are written 5' to 3'. Positions given are based on the genome sequence for *M. guttatus* IM62. PCR protocols are found in Kelly and Willis (1998). LG = linkage group.

| Marker                | LG | Position | Primer Sequences         |                           |
|-----------------------|----|----------|--------------------------|---------------------------|
| <u>DIV1 Inversion</u> |    |          |                          |                           |
| MgSTS299              | 8  | 1844602  | F: CTTGATCTTCATGCTCACACG | R: TAATCACATTCGGCAACTCG   |
| MgSTS675              | 8  | 2044482  | F: TCGTTGGTGGAAATCAAAGC  | R: CCGGATCCTTGTGAGTAGC    |
| MgSTS173              | 8  | 2444182  | F: GGCAATCTTCAACCTTTTCC  | R: AGGCTGGTGGCTTATCTTCC   |
| MgSTS059              | 8  | 2636431  | F: TTTCCGATTGGAGATTCGAC  | R: ACTCCAGGAACGTTTGGATG   |
| MgSTS084              | 8  | 2943772  | F: CCACCGAAGAAGTTGAAACC  | R: GCCTTAATAGGACCCCAAC    |
| MgSTS278              | 8  | 3605725  | F: ACGTCAGCCCTTTGTACACC  | R: ACTCAGTTGTGCCAGTCACC   |
| MgSTS563              | 8  | 3695076  | F: AAAGTGGTGTGCTGAAAGAGC | R: GCTTCCACCGTAAATTCTCC   |
| MgSTS069              | 8  | 3717111  | F: GAGGAAGTGGGAGACGACAA  | R: CCTTCCAACGATCCAATCAT   |
| <u>Noninversion</u>   |    |          |                          |                           |
| MgSTS665              | 1  | 5030756  | F: CATTGCAAAGCGATTACCC   | R: ATGCAAAGCCTGAAAAGTGC   |
| MgSTS617              | 2  | 2505570  | F: CGCCTTGGGAAGAGTTAATCG | R: ATCGTTGGATCTCGTTGTCC   |
| MgSTS423              | 6  | 4650184  | F: TCTGATCTCTCGAACCTCTCG | R: ATCTAGCTCGCACCAACTCC   |
| MgSTS571              | 8  | 8885823  | F: TGCTTTCTCTGCATCACTCG  | R: CTCTACCCCGGTTGTATTGC   |
| MgSTS837              | 10 | 357023   | F: AATGACGCACGATCTCTCG   | R: GGAACCCCTATCATCACTTTCC |
| MgSTS332              | 10 | 18598693 | F: GTGGTGTGCAATTCATTATCC | R: AAATTCATCACTGGACATTTCC |
| MgSTS672              | 14 | 25799001 | F: AATCAACCGCAATTCTGACC  | R: GGAATTAATCCTCAACAAAGC  |
| AAT217                | 17 | 727542   | F: ACCTGGACTACCATGTACCG  | R: CCTTGAGTACGGCTTCTTCG   |



**Supplementary Table 4** Genetic diversity indices for each locus for members of the *M. guttatus* sp. complex and for *M. guttatus* annuals and perennials.  $N_a$  = Number of alleles;  $H_e$  = expected heterozygosity;  $H_o$  = observed heterozygosity;  $F_{IS}$  = inbreeding coefficient; Inv = inverted region; NI = non-inverted region. Indices are given with standard error. Indices for which the inversion markers exhibit lower diversity than the noninversion markers are in bold. NA = insufficient data.

| <i>Taxon</i>                      | Inv Locus | $N_a$ | $H_o$ | $H_e$ | $F_{IS}$ |
|-----------------------------------|-----------|-------|-------|-------|----------|
| <i>M. guttatus</i> annuals        | 69        | 38    | 0.421 | 0.883 | 0.522    |
|                                   | 278       | 38    | 0.421 | 0.928 | 0.551    |
|                                   | 675       | 19    | 0.421 | 0.872 | 0.517    |
|                                   | 59        | 6     | 0.263 | 0.759 | 0.653    |
|                                   | 299       | 18    | 0.395 | 0.897 | 0.560    |
|                                   | 173       | 11    | 0.395 | 0.800 | 0.506    |
|                                   | 563       | 9     | 0.211 | 0.765 | 0.725    |
|                                   | 84        | 19    | 0.421 | 0.889 | 0.526    |
| <i>M. guttatus</i> perennials     | 69        | 12    | 0.227 | 0.830 | 0.723    |
|                                   | 278       | 21    | 0.405 | 0.902 | 0.551    |
|                                   | 675       | 15    | 0.267 | 0.877 | 0.692    |
|                                   | 59        | 7     | 0.364 | 0.791 | 0.540    |
|                                   | 299       | 18    | 0.333 | 0.893 | 0.627    |
|                                   | 173       | 7     | 0.222 | 0.613 | 0.637    |
|                                   | 563       | 10    | 0.244 | 0.724 | 0.662    |
|                                   | 84        | 15    | 0.341 | 0.759 | 0.551    |
| <i>M. guttatus</i> all accessions | 69        | 16    | 0.317 | 0.885 | 0.642    |
|                                   | 278       | 31    | 0.413 | 0.938 | 0.560    |
|                                   | 675       | 24    | 0.337 | 0.896 | 0.624    |
|                                   | 59        | 9     | 0.317 | 0.792 | 0.600    |
|                                   | 299       | 24    | 0.361 | 0.914 | 0.605    |
|                                   | 173       | 12    | 0.301 | 0.779 | 0.613    |
|                                   | 563       | 13    | 0.229 | 0.770 | 0.703    |
|                                   | 84        | 26    | 0.378 | 0.850 | 0.555    |



|                      |     |   |       |       |        |
|----------------------|-----|---|-------|-------|--------|
| <i>M. arvensis</i>   | 69  | 1 | 0.000 | 0.000 | NA     |
|                      | 278 | 1 | 0.000 | 0.000 | NA     |
|                      | 675 | 2 | 0.000 | 0.444 | 1.000  |
|                      | 59  | 1 | 0.000 | 0.000 | NA     |
|                      | 299 | 2 | 0.000 | 0.000 | 1.000  |
|                      | 173 | 1 | 0.000 | 0.000 | NA     |
|                      | 563 | 2 | 0.000 | 0.444 | 1.000  |
|                      | 84  | 2 | 0.000 | 0.444 | 1.000  |
| <i>M. laciniatus</i> | 69  | 2 | 0.111 | 0.475 | 0.766  |
|                      | 278 | 4 | 0.333 | 0.599 | 0.443  |
|                      | 675 | 3 | 0.222 | 0.494 | 0.550  |
|                      | 59  | 3 | 0.000 | 0.370 | 1.000  |
|                      | 299 | 4 | 0.222 | 0.636 | 0.650  |
|                      | 173 | 3 | 0.222 | 0.204 | -0.091 |
|                      | 563 | 5 | 0.222 | 0.728 | 0.695  |
|                      | 84  | 8 | 0.444 | 0.852 | 0.478  |
| <i>M. nasutus</i>    | 69  | 6 | 0.167 | 0.719 | 0.768  |
|                      | 278 | 4 | 0.417 | 0.451 | 0.077  |
|                      | 675 | 5 | 0.250 | 0.361 | 0.308  |
|                      | 59  | 4 | 0.083 | 0.538 | 0.845  |
|                      | 299 | 4 | 0.000 | 0.583 | 1.000  |
|                      | 173 | 3 | 0.000 | 0.292 | 1.000  |
|                      | 563 | 4 | 0.295 | 0.308 | 0.435  |
|                      | 84  | 4 | 0.083 | 0.601 | 0.861  |
| <i>M. tilingii</i>   | 69  | 5 | 0.111 | 0.772 | 0.856  |
|                      | 278 | 6 | 0.333 | 0.796 | 0.581  |
|                      | 675 | 5 | 0.444 | 0.765 | 0.419  |
|                      | 59  | 9 | 0.000 | 0.494 | 1.000  |
|                      | 299 | 8 | 0.333 | 0.809 | 0.588  |
|                      | 173 | 6 | 0.222 | 0.741 | 0.700  |
|                      | 563 | 2 | 0.111 | 0.500 | 0.778  |
|                      | 84  | 4 | 0.889 | 0.673 | -0.321 |

| <i>Taxon</i>                      | NI Locus                      | $N_a$ | $H_o$ | $H_e$ | $F_{IS}$ |
|-----------------------------------|-------------------------------|-------|-------|-------|----------|
| <i>M. guttatus</i> annuals        | 217                           | 14    | 0.528 | 0.858 | 0.385    |
|                                   | 837                           | 26    | 0.405 | 0.934 | 0.566    |
|                                   | 672                           | 24    | 0.447 | 0.928 | 0.518    |
|                                   | 617                           | 25    | 0.541 | 0.942 | 0.426    |
|                                   | 665                           | 26    | 0.237 | 0.929 | 0.745    |
|                                   | 423                           | 31    | 0.421 | 0.948 | 0.556    |
|                                   | 571                           | 17    | 0.474 | 0.859 | 0.449    |
|                                   | <i>M. guttatus</i> perennials | 217   | 7     | 0.279 | 0.813    |
| 837                               |                               | 24    | 0.205 | 0.941 | 0.783    |
| 672                               |                               | 19    | 0.395 | 0.890 | 0.556    |
| 617                               |                               | 24    | 0.535 | 0.932 | 0.426    |
| 665                               |                               | 22    | 0.279 | 0.917 | 0.696    |
| 423                               |                               | 25    | 0.326 | 0.895 | 0.636    |
| 571                               |                               | 10    | 0.273 | 0.778 | 0.649    |
| 332                               |                               | 8     | 0.111 | 0.400 | 0.722    |
| <i>M. guttatus</i> all accessions | 217                           | 13    | 0.380 | 0.842 | 0.549    |
|                                   | 837                           | 34    | 0.296 | 0.945 | 0.687    |
|                                   | 672                           | 30    | 0.420 | 0.919 | 0.543    |
|                                   | 617                           | 29    | 0.538 | 0.943 | 0.430    |
|                                   | 665                           | 34    | 0.259 | 0.938 | 0.724    |
|                                   | 423                           | 35    | 0.370 | 0.935 | 0.604    |
|                                   | 571                           | 19    | 0.378 | 0.833 | 0.546    |
|                                   | 332                           | 11    | 0.157 | 0.487 | 0.678    |
| <i>M. arvensis</i>                | 217                           | 1     | 0.000 | 0.000 | NA       |
|                                   | 837                           | 3     | 0.000 | 0.667 | 1.000    |
|                                   | 672                           | 1     | 0.000 | 0.000 | NA       |
|                                   | 617                           | 3     | 0.333 | 0.611 | 0.455    |
|                                   | 665                           | 2     | 0.000 | 0.444 | 1.000    |
|                                   | 423                           | 4     | 0.667 | 0.667 | 0.000    |
|                                   | 571                           | 2     | 0.000 | 0.444 | 1.000    |

|                      |     |    |       |       |       |
|----------------------|-----|----|-------|-------|-------|
|                      | 332 | 1  | 0.000 | 0.000 | NA    |
| <i>M. laciniatus</i> | 217 | 4  | 0.222 | 0.568 | 0.609 |
|                      | 837 | 7  | 0.000 | 0.815 | 1.000 |
|                      | 672 | 5  | 0.125 | 0.758 | 0.835 |
|                      | 617 | 5  | 0.222 | 0.673 | 0.670 |
|                      | 665 | 7  | 0.333 | 0.710 | 0.530 |
|                      | 423 | 3  | 0.000 | 0.494 | 1.000 |
|                      | 571 | 5  | 0.333 | 0.623 | 0.465 |
|                      | 332 | 1  | 0.000 | 0.000 | NA    |
| <i>M. nasutus</i>    | 217 | 4  | 0.167 | 0.635 | 0.738 |
|                      | 837 | 7  | 0.083 | 0.767 | 0.891 |
|                      | 672 | 3  | 0.083 | 0.344 | 0.758 |
|                      | 617 | 5  | 0.364 | 0.587 | 0.380 |
|                      | 665 | 5  | 0.500 | 0.764 | 0.345 |
|                      | 423 | 4  | 0.083 | 0.358 | 0.767 |
|                      | 571 | 6  | 0.250 | 0.569 | 0.561 |
|                      | 332 | 3  | 0.083 | 0.392 | 0.788 |
| <i>M. tilingii</i>   | 217 | 7  | 0.444 | 0.710 | 0.374 |
|                      | 837 | 6  | 0.000 | 0.741 | 1.000 |
|                      | 672 | 11 | 0.667 | 0.895 | 0.255 |
|                      | 617 | 10 | 0.556 | 0.883 | 0.371 |
|                      | 665 | 7  | 0.444 | 0.802 | 0.446 |
|                      | 423 | 6  | 0.111 | 0.772 | 0.856 |
|                      | 571 | 7  | 0.667 | 0.796 | 0.163 |
|                      | 332 | 3  | 0.000 | 0.370 | 1.000 |

---

**Supplementary Table 5** Results of stepwise forward selection of variables for inclusion in RDA. CV = coefficient of variation. Mean diurnal range = mean of monthly (max temp – min temp). Temperature annual range = max temperature warmest month – min temperature coldest month. Isothermality = (mean diurnal range/temperature annual range)\* 100. Temperature Seasonality (standard deviation \*100). \*  $p \leq 0.050$ , \*\*  $p \leq 0.010$ , \*\*\*  $p \leq 0.001$ .

| Model                                                                                                                                                                   | AIC      |
|-------------------------------------------------------------------------------------------------------------------------------------------------------------------------|----------|
| <u>Noninversion</u>                                                                                                                                                     |          |
| Mean temperature coldest quarter + Mean temperature driest quarter<br>+ Min. temperature coldest month + Temperature annual range<br>+ Temperature seasonality          | 121.23*  |
| + Precipitation CV                                                                                                                                                      | 121.99   |
| + Mean temperature warmest quarter                                                                                                                                      | 121.98   |
| + Annual mean temperature                                                                                                                                               | 122.11   |
| + Isothermality                                                                                                                                                         | 122.13   |
| + Annual precipitation                                                                                                                                                  | 122.19   |
| + Precipitation coldest quarter                                                                                                                                         | 122.17   |
| + Precipitation wettest quarter                                                                                                                                         | 122.18   |
| + Precipitation wettest month                                                                                                                                           | 122.24   |
| + Precipitation warmest quarter                                                                                                                                         | 122.25   |
| + Precipitation driest month                                                                                                                                            | 122.27   |
| + Mean diurnal range (Mean of monthly (max temp - min temp))                                                                                                            | 122.36   |
| + Precipitation driest quarter                                                                                                                                          | 122.38   |
| + Mean temperature wettest quarter                                                                                                                                      | 122.58   |
| + Maximum temperature warmest month                                                                                                                                     | 121.23   |
| <u>Inversion</u>                                                                                                                                                        |          |
| Minimum temperature coldest month + Precipitation wettest month<br>+Precipitation wettest quarter + Precipitation warmest quarter<br>+ Precipitation CV + Isothermality | 132.91** |
| + Precipitation driest month                                                                                                                                            | 133.56   |

|                                     |        |
|-------------------------------------|--------|
| + Precipitation driest quarter      | 133.63 |
| + Mean temperature driest quarter   | 133.63 |
| + Maximum temperature warmest month | 133.83 |
| + Mean diurnal range                | 133.79 |
| + Temperature annual range          | 133.83 |
| + Mean temperature wettest quarter  | 133.99 |
| + Annual precipitation              | 133.95 |
| + Mean temperature warmest quarter  | 133.98 |
| + Annual mean temperature           | 134.01 |
| + Precipitation coldest quarter     | 134.02 |
| + Mean temperature coldest quarter  | 134.02 |
| + Temperature seasonality           | 133.98 |

---

## **Appendix 1**

We conducted a redundancy analysis (RDA) to determine whether variation in morphology and flowering time was correlated with variation in noninversion and inversion markers. We selected variables by first performing a RDA with stepwise forward addition of the morphological variables and flowering time and assessing their significance using AIC. We retained any variables that explained significant portions of genomic variation for full RDA and partial RDA (the latter where the annual/perennial status of *M. guttatus* accessions was held constant). We found that one variable (height in cm) was correlated with noninversion variation and one variable (diameter between the first and second true leaves) was correlated with inversion variation (Supplementary Table 6). In a full RDA, we found that annual/perennial status was significantly associated with both noninversion and inversion marker variation. Height was significantly correlated with noninversion variation and diameter between first and second true leaves and significantly correlated with inversion variation (Supplementary Table 7); these correlations did not change in a partial RDA where annual/perennial status was held constant.

**Supplementary Table 6** Results of stepwise forward selection of morphological variables and flowering time for inclusion in RDA. \*  $p \leq 0.050$ , \*\*  $p \leq 0.010$ , \*\*\*  $p \leq 0.001$ .

| Model                                                             | AIC      |
|-------------------------------------------------------------------|----------|
| <u>Noninversion</u>                                               |          |
| Height (cm)                                                       | 104.98** |
| Flowering time post germination (days)                            | 105.62   |
| Length of first leaf (mm)                                         | 105.65   |
| Width of first leaf (mm)                                          | 105.76   |
| Length of first flower (mm)                                       | 105.75   |
| Length of second internode (mm)                                   | 105.80   |
| Number of pairs of leaves upon flowering                          | 105.97   |
| Width of first flower (mm)                                        | 106.01   |
| Diameter btw 1 <sup>st</sup> and 2 <sup>nd</sup> true leaves (mm) | 106.28   |
| Presence of anthocyanin calyx spots                               | 107.01   |
| <u>Inversion</u>                                                  |          |
| Diameter btw 1 <sup>st</sup> and 2 <sup>nd</sup> true leaves (mm) | 117.43** |
| Length of first flower (mm)                                       | 118.12   |
| Width of first flower (mm)                                        | 118.26   |
| Flowering time post germination (days)                            | 118.21   |
| Number of pairs of leaves upon flowering                          | 118.24   |
| Presence of anthocyanin calyx spots                               | 119.19   |
| Length of second internode (mm)                                   | 118.33   |
| Length of first leaf (mm)                                         | 118.43   |
| Height (cm)                                                       | 118.46   |
| Width of first leaf (mm)                                          | 118.52   |

**Supplementary Table 7** Results of redundancy analysis testing for associations between morphology variables and variation in the inversion and non-inversion markers within *M. guttatus*. All terms remain significant when annual/perennial status is held constant. Significance assessed with a minimum of 1,000 permutations: \* $p \leq 0.05$ , \*\* $p \leq 0.01$ , \*\*\* $p \leq 0.001$ .

|                                                              | % variance | <i>P</i> |
|--------------------------------------------------------------|------------|----------|
| <u>Inversion</u>                                             |            |          |
| Annual/Perennial                                             | 23.25      | 0.001*** |
| Diameter btw 1 <sup>st</sup> and 2 <sup>nd</sup> true leaves | 18.63      | 0.001*** |
| <u>Noninversion</u>                                          |            |          |
| Annual/Perennial                                             | 12.78      | 0.022*   |
| Height (cm)                                                  | 20.22      | 0.001**  |



## Appendix 2

We investigated whether  $F_{ST}$  and allelic variation in the DIV1 inversion markers could be a function of distance to the breakpoints. Plots of  $F_{ST}$  and number of alleles ( $N_a$ ) of inversion markers with respect to their position on linkage group 8 show little evidence of an association (Supplementary Figures 1 and 2). There is no significant correlation between  $F_{ST}$  and distance to the leftmost breakpoint (as determined by recent mapping experiments (Friedman, unpublished data) ( $r = 0.19$ ,  $p = 0.68$ ; Spearman rank correlation coefficient). Similarly, there is no significant correlation between number of alleles and distance to the leftmost breakpoint. ( $r = -0.13$ ,  $p = 0.78$ ; Spearman rank correlation coefficient). Since  $F_{ST}$  can be impacted by the heterozygosity of the individual markers, and since we have so few markers, this analysis should be interpreted with caution. This question would be better addressed with genomic sequence data.

Supplementary Figure 1

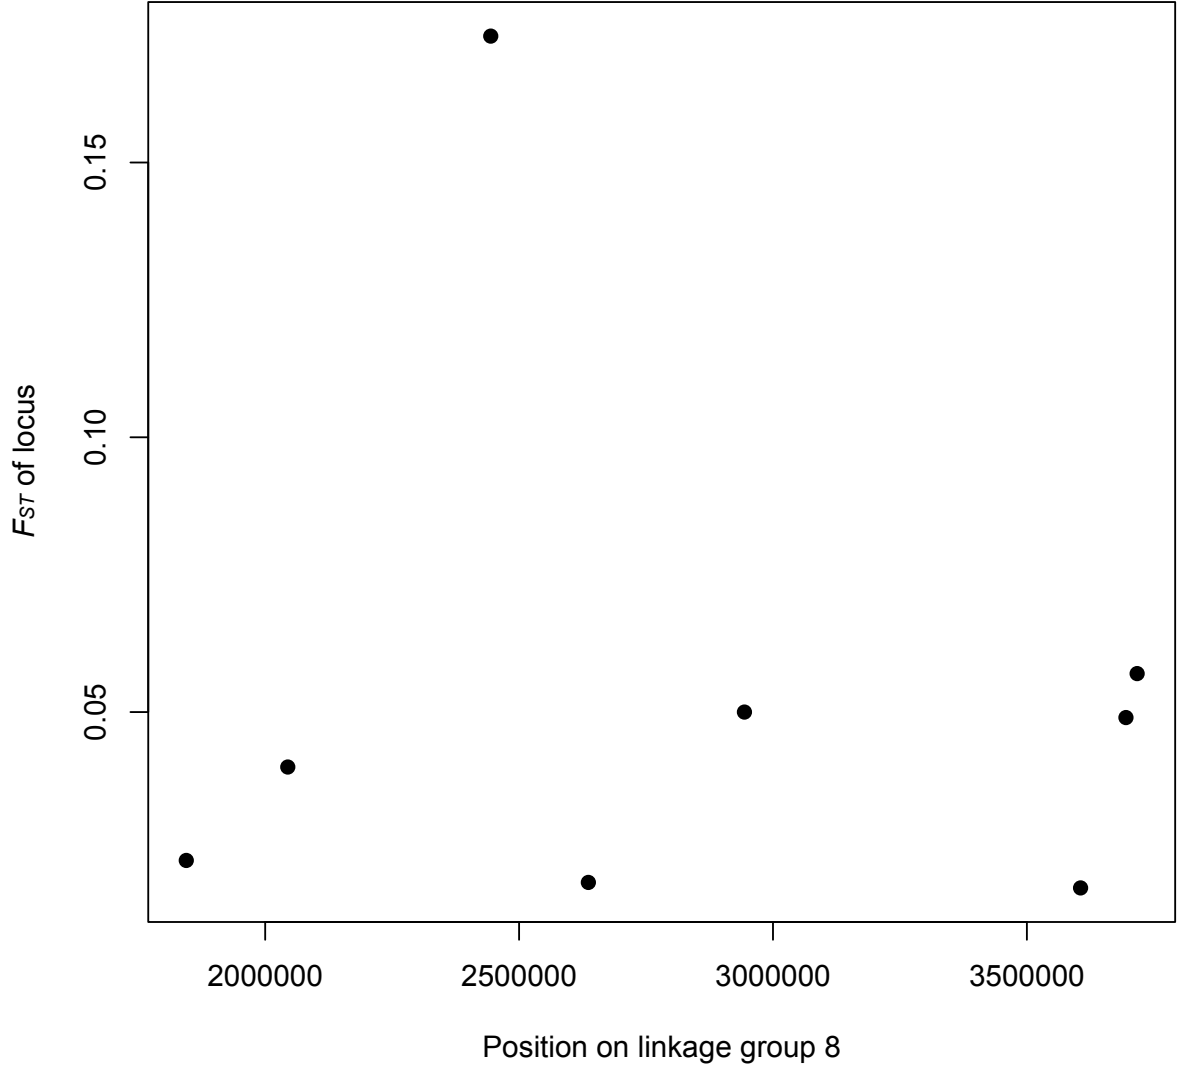

Supplementary Figure 2

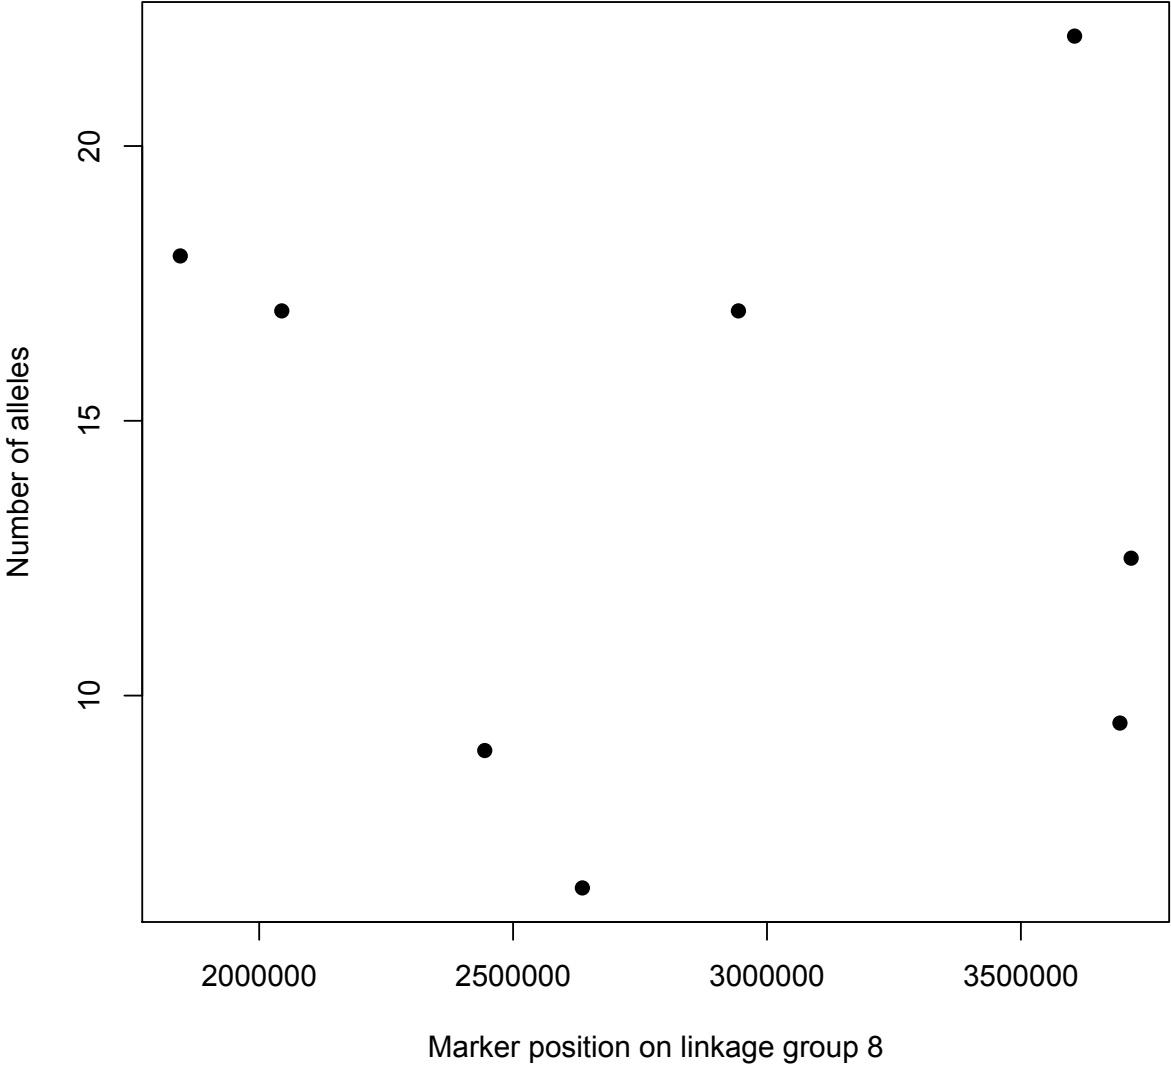

Supplement: NIHMS591015-supplement-Supporting_Information.pdf [file NIHMS591015-supplement-Supporting_Information.pdf]
